# Supplementary material for: Early Life Microbiota Colonization at Six Months of Age: A Transitional Time Point
Source: Front Cell Infect Microbiol. 2021 Mar 26;11:590202. doi: 10.3389/fcimb.2021.590202 (PMC8032992; doi:10.3389/fcimb.2021.590202)
Supplement: Supplementary file 3 [file DataSheet_3.csv]

Sample_sheet_Hellas_Febbraio2020
[Header]
IEMFileVersion	5
Experiment Name	Hellas_Cena_16S
Date	07/02/2020
Workflow	Metagenomics
Application	Metagenomics 16S rRNA
Instrument Type	MiSeq
Assay	Nextera XT
Index Adapters,"Nextera XT v2 Index Kit"
Chemistry	Amplicon
[Reads]
301
301
[Settings]
[Data]
Sample_ID	Sample_Name	Sample_Plate	Sample_Well	I7_Index_ID	index	I5_Index_ID	index2	Sample_Project	Description
37T2	37T2			N701-A	TAAGGCGA	S502-A	CTCTCTAT	HellasCena
27T2	27T2			N702-A	CGTACTAG	S502-A	CTCTCTAT	HellasCena
44T2	44T2			N703-A	AGGCAGAA	S502-A	CTCTCTAT	HellasCena
9T2	9T2			N704-A	TCCTGAGC	S502-A	CTCTCTAT	HellasCena
10T2	10T2			N705-A	GGACTCCT	S502-A	CTCTCTAT	HellasCena
8T2	8T2			N706-A	TAGGCATG	S502-A	CTCTCTAT	HellasCena
17T2	17T2			N710-A	CGAGGCTG	S502-A	CTCTCTAT	HellasCena
35T2	35T2			N711-A	AAGAGGCA	S502-A	CTCTCTAT	HellasCena
15T2	15T2			N712-A	GTAGAGGA	S502-A	CTCTCTAT	HellasCena
6T2	6T2			N714-A	GCTCATGA	S502-A	CTCTCTAT	HellasCena
13T2	13T2			N715-A	ATCTCAGG	S502-A	CTCTCTAT	HellasCena
32T2	32T2			N701-A	TAAGGCGA	S503-A	TATCCTCT	HellasCena
14T2	14T2			N702-A	CGTACTAG	S503-A	TATCCTCT	HellasCena
60T2	60T2			N703-A	AGGCAGAA	S503-A	TATCCTCT	HellasCena
23T2	23T2			N704-A	TCCTGAGC	S503-A	TATCCTCT	HellasCena
12T2	12T2			N705-A	GGACTCCT	S503-A	TATCCTCT	HellasCena
34T2	34T2			N706-A	TAGGCATG	S503-A	TATCCTCT	HellasCena
30T2	30T2			N710-A	CGAGGCTG	S503-A	TATCCTCT	HellasCena
21T2	21T2			N711-A	AAGAGGCA	S503-A	TATCCTCT	HellasCena
28T2	28T2			N712-A	GTAGAGGA	S503-A	TATCCTCT	HellasCena
50T2	50T2			N714-A	GCTCATGA	S503-A	TATCCTCT	HellasCena
40T2	40T2			N715-A	ATCTCAGG	S503-A	TATCCTCT	HellasCena
55T2	55T2			N701-A	TAAGGCGA	S505-A	GTAAGGAG	HellasCena
46T2	46T2			N702-A	CGTACTAG	S505-A	GTAAGGAG	HellasCena
41T2	41T2			N703-A	AGGCAGAA	S505-A	GTAAGGAG	HellasCena
61T2	61T2			N704-A	TCCTGAGC	S505-A	GTAAGGAG	HellasCena
59T2	59T2			N705-A	GGACTCCT	S505-A	GTAAGGAG	HellasCena
53T2	53T2			N706-A	TAGGCATG	S505-A	GTAAGGAG	HellasCena
63T2	63T2			N710-A	CGAGGCTG	S505-A	GTAAGGAG	HellasCena
54T2	54T2			N711-A	AAGAGGCA	S505-A	GTAAGGAG	HellasCena
3T2	3T2			N712-A	GTAGAGGA	S505-A	GTAAGGAG	HellasCena
58T2	58T2			N714-A	GCTCATGA	S505-A	GTAAGGAG	HellasCena
45T2	45T2			N715-A	ATCTCAGG	S505-A	GTAAGGAG	HellasCena
47T2	47T2			N701-A	TAAGGCGA	S508-A	CTAAGCCT	HellasCena
42T2	42T2			N702-A	CGTACTAG	S508-A	CTAAGCCT	HellasCena
20T2	20T2			N703-A	AGGCAGAA	S508-A	CTAAGCCT	HellasCena
7T2	7T2			N704-A	TCCTGAGC	S508-A	CTAAGCCT	HellasCena
38T2	38T2			N705-A	GGACTCCT	S508-A	CTAAGCCT	HellasCena
19T2	19T2			N706-A	TAGGCATG	S508-A	CTAAGCCT	HellasCena
5T2	5T2			N710-A	CGAGGCTG	S508-A	CTAAGCCT	HellasCena
24T2	24T2			N711-A	AAGAGGCA	S508-A	CTAAGCCT	HellasCena
51T2	51T2			N712-A	GTAGAGGA	S508-A	CTAAGCCT	HellasCena
39T2	39T2			N714-A	GCTCATGA	S508-A	CTAAGCCT	HellasCena
22T2	22T2			N715-A	ATCTCAGG	S508-A	CTAAGCCT	HellasCena
11T2	11T2			N701-A	TAAGGCGA	S510-A	CGTCTAAT	HellasCena
33T2	33T2			N702-A	CGTACTAG	S510-A	CGTCTAAT	HellasCena
56T2	56T2			N703-A	AGGCAGAA	S510-A	CGTCTAAT	HellasCena
43T2	43T2			N704-A	TCCTGAGC	S510-A	CGTCTAAT	HellasCena
18T2	18T2			N705-A	GGACTCCT	S510-A	CGTCTAAT	HellasCena
26T2	26T2			N706-A	TAGGCATG	S510-A	CGTCTAAT	HellasCena
2T2	2T2			N710-A	CGAGGCTG	S510-A	CGTCTAAT	HellasCena
49T2	49T2			N711-A	AAGAGGCA	S510-A	CGTCTAAT	HellasCena
29T2	29T2			N712-A	GTAGAGGA	S510-A	CGTCTAAT	HellasCena
ctrl_neg		N715-A	ATCTCAGG	S518-C	CTATTAAG	HellasCena
