# Supplementary material for: Early Life Microbiota Colonization at Six Months of Age: A Transitional Time Point
Source: Front Cell Infect Microbiol. 2021 Mar 26;11:590202. doi: 10.3389/fcimb.2021.590202 (PMC8032992; doi:10.3389/fcimb.2021.590202)
Supplement: Supplementary file 5 [file DataSheet_5.xlsx]

## Sheet: Sheet1
Spectrophotometric measurements (A260/A280 and A260/A230 ratios) and Nucleic Acid concentration (ng/µl) estimated by NanoDrop (ND-1000; Thermo Scientific, Waltham, MA) of infants' fecal samples at six months of age after total DNA exctraction and before amplification (PCR) analysis.
Sample ID	Nucleic Acid Conc.	Unit	A260	A280	260/280	260/230	Sample Type	Factor
#37 T2	95.3	ng/µl	1906	0.966	1.97	1.89	DNA	50
#27 T2	34.0	ng/µl	0.679	0.336	2.02	2.05	DNA	50
#44 T2	15.6	ng/µl	0.313	0.159	1.97	1.70	DNA	50
#9 T2	49.0	ng/µl	0.980	0.446	2.20	2.31	DNA	50
#10 T2	7.3	ng/µl	0.147	0.067	2.20	1.03	DNA	50
#8 T2	8.9	ng/µl	0.177	0.088	2.02	1.15	DNA	50
#17 T2	3.2	ng/µl	0.064	0.022	2.88	0.64	DNA	50
#35 T2	12.9	ng/µl	0.259	0.123	2.10	1.76	DNA	50
#15 T2	5.6	ng/µl	0.111	0.065	1.72	0.52	DNA	50
#6 T2	3.5	ng/µl	0.069	0.023	3.05	0.87	DNA	50
#13 T2	16.9	ng/µl	0.338	0.168	2.01	1.69	DNA	50
#32 T2	5.9	ng/µl	0.119	0.063	1.89	1.61	DNA	50
#14 T2	35.3	ng/µl	0.706	0.382	1.85	1.50	DNA	50
#60 T2	18.9	ng/µl	0.378	0.193	1.95	2.76	DNA	50
#23 T2	7.6	ng/µl	0.152	0.070	2.16	1.78	DNA	50
#12 T2	5.2	ng/µl	0.104	0.044	2.39	9.00	DNA	50
#34 T2	19.0	ng/µl	0.381	0.219	1.74	1.15	DNA	50
#30 T2	3.5	ng/µl	0.070	0.032	2.18	0.55	DNA	50
#21 T2	18.9	ng/µl	0.378	0.189	1.99	1.37	DNA	50
#28 T2	8.3	ng/µl	0.165	0.072	2.29	3.82	DNA	50
#50 T2	18.7	ng/µl	0.375	0.188	1.99	2.14	DNA	50
#40 T2	37.4	ng/µl	0.748	0.385	1.94	2.02	DNA	50
#55 T2	7.5	ng/µl	0.150	0.073	2.04	2.64	DNA	50
#46 T2	31.5	ng/µl	0.630	0.338	1.86	1.40	DNA	50
#41 T2	0.6	ng/µl	0.011	0.009	1.26	-0.39	DNA	50
#61 T2	12.3	ng/µl	0.246	0.170	1.44	0.30	DNA	50
#59 T2	11.9	ng/µl	0.238	0.111	2.14	2.14	DNA	50
#53 T2	21.5	ng/µl	0.429	0.220	1.96	0.71	DNA	50
#63 T2	17.0	ng/µl	0.339	0.173	1.96	2.12	DNA	50
#54 T2	19.6	ng/µl	0.393	0.199	1.97	1.00	DNA	50
#3 T2	5.7	ng/µl	0.115	0.044	2.60	1.10	DNA	50
#58 T2	6.9	ng/µl	0.138	0.059	2.34	0.73	DNA	50
#45 T2	7.7	ng/µl	0.154	0.068	2.28	1.22	DNA	50
#47 T2	9.2	ng/µl	0.184	0.111	1.66	0.48	DNA	50
#42 T2	1.6	ng/µl	0.032	0.001	47.47	3.12	DNA	50
#20 T2	12.5	ng/µl	0.250	0.116	2.15	0.90	DNA	50
#7 T2	8.6	ng/µl	0.172	0.076	2.27	1.77	DNA	50
#38 T2	2.3	ng/µl	0.046	0.024	1.92	3.03	DNA	50
#19 T2	3.3	ng/µl	0.066	0.024	2.71	1.82	DNA	50
#5 T2	52.8	ng/µl	1055	0.542	1.95	2.16	DNA	50
#24 T2	19.2	ng/µl	0.384	0.178	2.16	1.85	DNA	50
#51 T2	6.9	ng/µl	0.139	0.067	2.06	0.81	DNA	50
#39 T2	10.0	ng/µl	0.200	0.113	1.78	0.48	DNA	50
#22 T2	58.0	ng/µl	1160	0.598	1.94	2.13	DNA	50
#11 T2	15.5	ng/µl	0.310	0.151	2.06	2.11	DNA	50
#33 T2	2.5	ng/µl	0.049	0.014	3.55	0.95	DNA	50
#56 T2	4.3	ng/µl	0.085	0.030	2.86	1.77	DNA	50
#43 T2	17.7	ng/µl	0.355	0.176	2.01	1.78	DNA	50
#18 T2	40.9	ng/µl	0.817	0.425	1.92	1.16	DNA	50
#26 T2	6.3	ng/µl	0.125	0.055	2.28	3.24	DNA	50
#2 T2	49.1	ng/µl	0.983	0.505	1.95	1.76	DNA	50
#49 T2	2.3	ng/µl	0.045	0.008	5.82	1.86	DNA	50
#29 T2	7.9	ng/µl	0.158	0.067	2.36	1.69	DNA	50

## Sheet: Sheet2
DNA evaluation by Qubit Fluorometer 1.0 (Invitrogen Co., Carlsbad, CA)
Campione	[ ] ng/ul (Qubit)	Size in bp
#37 T2	210.7	607
#27 T2	261.9	599
#44 T2	279.1	605
#9 T2	115.4	588
#10 T2	221.8	593
#8 T2	173.9	593
#17 T2	97	583
#35 T2	161.3	593
#15 T2	143.9	599
#6 T2	161.1	596
#13 T2	149.2	597
#32 T2	195.5	600
#14 T2	108.8	600
#60 T2	185.4	605
#23 T2	203.5	602
#12 T2	207.9	601
#34 T2	169.2	596
#30 T2	72.7	601
#21 T2	189.7	608
#28 T2	170.3	595
#50 T2	188	614
#40 T2	201.7	602
#55 T2	205.1	591
#46 T2	159.3	586
#41 T2	51	587
#61 T2	83.2	596
#59 T2	39.2	591
#53 T2	68.2	595
#63 T2	58	601
#54 T2	95.8	600
#3 T2	48.8	595
#58 T2	73.9	586
#45 T2	54.9	579
#47 T2	15.3	612
#42 T2	62.2	596
#20 T2	37.2	606
#7 T2	132	600
#38 T2	140.7	591
#19 T2	77.1	592
#5 T2	83.6	604
#24 T2	59.8	582
#51 T2	70.4	586
#39 T2	22.2	609
#22 T2	73.7	618
#11 T2	163.6	593
#33 T2	120.5	598
#56 T2	35.3	589
#43 T2	114.4	588
#18 T2	100.7	586
#26 T2	87.8	582
#2 T2	118	606
#49 T2	122.5	591
#29 T2	115.4	595
ctrl neg 1	too low
ctrl neg 2	too low
